# Supplementary material for: Association of a Variant of CNR1 Gene Encoding Cannabinoid Receptor 1 With Gilles de la Tourette Syndrome
Source: Front Genet. 2020 Mar 4;11:125. doi: 10.3389/fgene.2020.00125 (PMC7065033; doi:10.3389/fgene.2020.00125)
Supplement: Supplementary Table 1 — The raw data used for analysis in this study. [file Table_1.xlsx]

## Sheet: Data
Group	Gender	Age at evaluation	Age of tic onset	rs806379	rs2023239	rs2180619	rs1049303	Peak tic severity 1=mild 2=moderate 3=severe	GTS only-0; GTS plus-1	ADHD 1-yes, 0-no	OCD/OCS 1-yes, 0-no	Learning Disorder 1-yes, 0-no	Mood Disorder 1-yes, 0-no	Anxiety Disorder 1-yes, 0-no	Conduct Disorder 1-yes, 0-no	ODD 1-yes, 0-no	FH of OCB/OCD 1-yes, 0-no	YGTSS TTS	YGTSS Total	SBTs 1-yes, 0-no	Cognitive tics 1-yes, 0-no	Dystonic tics 1-yes, 0-no	Koprophenomena 1-yes, 0-no	Echophenomena 1-yes, 0-no	Premonitory sensations 1-yes, 0-no	Sensory processing disorder 1-yes, 0-no	Aggression 1-yes, 0-no	Auto-aggression 1-yes, 0-no	Significant social skill problems 1-yes, 0-no	FH of tics 1-yes, 0-no
GTS	M	13	9	AT	TT	AG	CC	2	1	0	1	0	0	0	0								1				0	0	0	1
GTS	F	21	6	AA	TT	AG	CC	2	1	0	0	0	1	0	0								0				0	0	0	1
GTS	M	20	9	AA	TT	AG	CC	2	0	0	0	0	0	0	0								0				0	0	0	1
GTS	M	14	12	AA	TT	GG	CC	2	1	1	0	1	0	0	0								0				0	0	0	1
GTS	M	40		TT	CT	AG	CT	2	0	0	0	0	0	0	0	0	1						0	0			0	0	0	1
GTS	M	53	10	AT	TT	AG	CC	2	1	0	1	0	0	0	0								0				0	0	0	0
GTS	M	28	14	AA	TT	AG	CC	3	1	0	1	0	1	1	0	0	0	41	71	0	1	1	0	1	1	1	1	0	0	0
GTS	M	17	6	AT	TT	AG	CT	1	1	0	0	1	0	0	0								0				0	0	0	1
GTS	M	9	5	AT	TT	AG	CC	2	1	1	0	0	0	0	0								0				0	0	0	1
GTS	M	26	7	AA	TT	AG	CT	2	1	0	1	0	1	0	0								0				0	0	0	1
GTS	M	43	4	AA	TT	AG	CC	2	1	1	1	0	1	0	0								0				0	1	0	1
GTS	M	14	7	AT	CT	AG	CT	2	1	1	0	1	0	1	0	0	0	25	35	1	0	1	1	0	1	0	0	0	0	0
GTS	M	11	5	AT	CT	AG	CC	2	1	1	0	1	0	0	0								0				0	0	0	0
GTS	M	39	13	TT	TT	AA	CC	3	1	0	1	0	0	0	0								1	1			0	0	0	0
GTS	F	28	16	TT	CT	AA	CC	2	0	0	0	0	0	0	0								0				0	0	0	0
GTS	F	17	11	AA	TT	AG	TT	2	1	0	1	0	0	1	0								1				0	0	0	0
GTS	M	24	9	AT	TT	AA	CC	2	1	1	1	1	1	0	0								1				1	1	1	0
GTS	M	30	15	AT	CT	AG	CC	2	1	0	0	1	0	0	0								0				0	0	0	1
GTS	F	26	6	TT	TT	AG	CT	3	1	0	0	1	0	1	0								1				1	1	0	0
GTS	M	20	8	AA	TT	AG	CC	2	0	0	0	0	0	0	0	0	0	13	23	0	0	0	0	0	1	0	0	0	0	1
GTS	M	22	15	AA	TT	AG	CC	2	1	0	0	1	0	0	0	0	0	26	46	0	0	1	0	0	1	1	0	0	0	1
GTS	F	30	6	AA	TT	AA	CC	2	1	0	1	0	0	0	0								0				0	0	0	1
GTS	F	22	6	AT	TT	AA	CC	1	1	1	1	1	0	1	0								0				1	0	0	0
GTS	M	12	7	AT	CT	AG	CC	3	0	0	0	0	0	0	0								0				1	0	0	1
GTS	F	18	4	TT	CT	AG	CT	2	1	1	0	0	0	0	0								0				0	0	0	0
GTS	M	25	8	AA	TT	AG	CT	3	1	0	1	0	0	0	0								0				0	0	0	0
GTS	M	16	12	TT	CT	GG	CT	2	1	1	0	1	0	0	0								1				1	1	0	0
GTS	M	19	4	AT	TT	AA	CC	2	1	0	0	1	0	0	0								0				1	0	0	1
GTS	M	25	7	TT	CT	AA	CT	2	0	0	0	0	0	0	0								0				0	0	0	0
GTS	M	19	10	AT	TT	AA	CC	2	1	1	0	0	0	0	0								0				0	0	0	0
GTS	M	22	4	AT	TT	AA	CC	2	0	0	0	0	0	0	0								0				0	0	0	1
GTS	M	16	6	AT	TT	AG	CC	1	1	1	0	1	0	1	0								0				0	1	0	1
GTS	M	11	7	AT	TT	AG	CT	2	1	1	1	1	0	0	1								1				1	1	0	0
GTS	M	13	5	AT	TT	AA	CT	3	1	0	1	1	0	1	1								1				1	1	0	0
GTS	M	10	8	TT	CT	AG	CC	1	1	1	0	1	0	0	0								0				0	0	0	1
GTS	M	14	11	TT	TT	AA	CC	2	1	1	1	1	1	1	1								1				0	1	1	0
GTS	M	15	14	AT	TT	AA	CT	1	1	1	0	1	0	0	0								0				0	0	0	0
GTS	M	20	8	TT	TT	AA	CC	2	1	0	1	0	0	0	0								0				0	0	0	1
GTS	M	19	12	TT	TT	AA	CC	2	0	0	0	0	0	0	0								0				0	0	0	1
GTS	M	30	9	TT	TT	AG	CC	3	1	1	1	0	1	0	0								0				0	1	0	1
GTS	M	16	11	AT	TT	AG	TT	3	1	0	0	1	0	0	0								1				0	0	0	1
GTS	F	10	3	AT	CT	AG	CT	3	1	0	1	1	0	0	1								1				1	0	0	0
GTS	M	24	3	AT	CT	AA	CT	2	1	0	1	1	0	0	0								0				0	0	0	1
GTS	M	19	3	AA	TT	GG	CC	1	1	0	0	1	0	0	0								0				0	0	0	1
GTS	M	12	5	AT	TT	AG	CC	2	1	1	1	0	0	1	0								1				1	1	0	0
GTS	M	16	7	AT	CT	AG	CC	2	1	0	0	0	0	1	0								0				0	0	0	0
GTS	M	13	4	AA	TT	GG	CT	1	0	0	0	0	0	0	0								0				0	0	0	1
GTS	M	24	5	AA	TT	AG	CC	3	1	0	0	0	1	1	0								0				0	0	0	0
GTS	M	18	13	AA	TT	AG	CT	2	0	0	0	0	0	0	0								0				0	0	0	0
GTS	F	11	11	AA	TT	AG	CC	2	0	0	0	0	0	0	0	0	1	24	44	0	0	1	0	0	1	1	0	0	0	0
GTS	M	24	7	AT	CT	AA	CT	1	0	0	0	0	0	0	0								0				0	0	0	0
GTS	M	18	6	AA	TT	AG	CT	2	1	1	0	1	0	0	1								0				1	0	0	0
GTS	M	19	7	AA	TT	GG	CC	2	1	0	0	1	0	0	0								0				0	1	0	1
GTS	M	14	12	TT	CT	AA	CC	1	1	0	0	1	0	0	0								0				0	0	0	0
GTS	M	16	3	TT	TT	AA	CC	2	1	0	1	1	0	0	0								0				0	0	0	1
GTS	M	27	9	AA	TT	AG	CC	3	1	1	1	1	0	1	0								0				0	1	0	0
GTS	M	10	8	AT	TT	AA	CT	2	1	1	0	0	1	1	1								1				1	0	1	1
GTS	M	12	2	AT	CT	AA	CT	2	1	1	1	1	0	0	1								0				1	0	0	1
GTS	F	33	17	AT	TT	AA	CT	2	1	0	0	0	1	0	0								1				0	0	0	1
GTS	F	14	4	AT	TT	AA	CC	3	1	1	1	0	0	0	0								0				0	0	0	1
GTS	M	15	9	AT	CT	GG	CT	2	0	0	0	0	0	0	0								0				0	0	0	1
GTS	F	12	6	AA	TT	AG	CC	2	1	1	0	0	0	0	0								0				1	1	0	0
GTS	M	18	7	AT	CT	AG	CC	2	1	0	1	0	1	0	0								0				1	1	0	0
GTS	M	15	5	TT	CC	GG	CT	2	0	0	0	0	0	0	0								0				0	1	0	1
GTS	M	17	16	AT	TT	AA	TT	2	0	0	0	0	0	0	0								0				0	0	0	0
GTS	M	13	11	AT	CT	AG	TT	3	1	1	0	0	0	0	0								1				1	0	0	1
GTS	M	24	10	AT	TT	AG	CT	2	1	0	0	0	0	1	0								0				0	0	0	1
GTS	M	17	5	TT	CT	AG	CC	2	1	1	1	0	0	1	0								0				0	0	0	0
GTS	M	14	8	AT	TT	AG	CC	3	1	1	0	0	0	0	0								0				0	0	0	0
GTS	M	14	6	AT	CT	AG	CC	2	0	0	0	0	0	0	0								0				0	0	0	0
GTS	M	20	7	AA	TT	AG	CT	2	1	1	0	0	0	0	0								1				0	1	0	1
GTS	M	15	8	AA	TT	AG	CC	3	1	0	1	0	0	0	0								0				0	0	0	0
GTS	M	21	7	AT	CT	AG	CC	2	1	0	0	1	0	0	0								0				0	0	0	0
GTS	M	24	7	AT	CT	AG	CT	2	0	0	0	0	0	0	0	0	0	47	87	1	0	1	1	1	1	1	1	1	0	0
GTS	M	11		AT	CT	AG	CT	3	1	1	1	1	1	1	0								0				1	1	0	1
GTS	M	26	8	TT	TT	AG	CT	3	1	1	1	0	0	0	1								0				0	0	0	0
GTS	F	42		AT	TT	AG	CT	1	0	0	0	0	0	0	0								0				0	0	0	1
GTS	M	19	5	AT	CT	AG	CT	1	0	0	0	0	0	0	0								0				0	0	1	0
GTS	M	36	5	AA	TT	GG	CC	2	1	1	1	1	1	0	1	0	0	40	70	0	0	1	1	0	0	1	0	0	0	1
GTS	M	18	14	AA	TT	GG	CC	2	1	0	1	0	0	0	0								0				1	0	0	0
GTS	M	31	6	TT	CT	AG	CC	3	1	1	1	0	0	0	0								0				0	0	0	1
GTS	M	35	12	AT	CT	AA	CC	3	1	1	0	0	0	0	0								1				1	1	0	1
GTS	F	25	8	AA	TT	AG	CC	3	1	0	1	0	1	1	0								0				1	1	0	1
GTS	M	29	7	AT	TT	AA	CC	2	1	1	1	0	0	1	0								0	1			1	1	0	0
GTS	M	35	6	AA	TT	AG	CT	3	1	0	0	0	1	0	0								1				1	1	0	0
GTS	M	17	7	AT	TT	AG	CC	2	1	1	1	0	0	0	0								1	0			0	1	0	1
GTS	F	31	13	AT	CT	AG	CT	2	0	0	0	0	0	0	0								0				0	1	0	0
GTS	M	18	7	TT	TT	AA	CT	3	1	1	1	0	0	1	1								1				0	1	0	0
GTS	M	23	7	AA	TT	AA	CT	2	1	1	0	0	0	0	0								0				0	0	0	0
GTS	M	30	7	AT	TT	AA	CC	2	0	0	0	0	0	0	0								0				0	0	0	0
GTS	F	21	7	TT	CT	AG	CC	1	0	0	0	0	0	0	0								0				0	0	0	1
GTS	M	10	7	AT	TT	AG	CC	2	1	1	0	0	0	0	0								0	0			0	0	0	1
GTS	M	36	7	AT	TT	AG	CT	3	1	1	1	1	0	1	0								1	0			0	0	0	0
GTS	M	14	7	AT	TT	AA	CC	2	1	1	0	0	0	0	0								1				1	0	0	0
GTS	M	24		AA	TT	GG	CC	1	0	0	0	0	0	0	0								0	0			0	0	0	1
GTS	M	25	11	AA	TT	AA	CT	2	1	0	1	0	0	0	0								0	0			0	0	0	0
GTS	M	21	6	TT	CT	AG	CC	2	1	1	1	0	0	0	1								0	1			1	0	0	0
GTS	M	21	9	TT	CT	AG	CC	2	0	0	0	0	0	0	0								0	0			0	0	0	0
GTS	M	10	6	AT	TT	AG	CT	2	1	0	1	0	0	0	0								0	0			0	0	0	1
GTS	M	22	6	TT	TT	GG	CT	3	1	0	0	0	0	1	0								0	0			0	0	0	0
GTS	F	33	6	TT	TT	AA	CC	2	0	0	0	0	0	0	0	0	0	28	58	1	1	0	0	0	1	0	0	0	0	1
GTS	M	29	7	TT	TT	AA	CT	2	1	0	1	0	0	0	0								0				0	0	0	0
GTS	F	21	10	AA	TT	AG	CC	3	0	0	0	0	0	0	0								0				0	0	0	0
GTS	M	9	2	TT	TT	AG	CC	2	1	1	1	1	0	1	0								1				1	0	1	1
GTS	M	20	7	TT	CT	AG	CC	2	1	1	1	0	0	0	0								0	0			0	0	0	1
GTS	M	24	12	TT	TT	AG	CT	1	1	0	1	0	0	0	0	0	1	46	96	1	1	1	1	1	0	0	1	0	0	1
GTS	F	34	6	AA	TT	AG	CT	2	1	0	1	0	1	1	0								0	0			0	0	1	1
GTS	M	11	5	AT	CT	AG	CC	2	0	0	0	0	0	0	0								0	0			0	0	0	0
GTS	M	19	5	TT	CT	AG	CT	2	1	1	1	1	1	1	0								0	1			1	0	1	0
GTS	M	35		AA	TT	AA	CT	1	0	0	0	0	0	0	0								0	0			0	0	0	1
GTS	F	27	7	AA	TT	GG	CC	2	1	1	0	0	0	0	0								0	0			1	0	1	1
GTS	M	12	12	AT	TT	AA	CC	3	1	0	0	0	0	0	0								0	0			0	0	0	1
GTS	F	18	7	AT	CT	AG	CT	2	1	1	1	1	0	0	0	0	1	42	72	1	1	1	1	0	1	1	1	1	1	1
GTS	M	11	3	AT	TT	AA	CT	1	0	0	0	0	0	0	0								0	0			0	0	0	1
GTS	M	13	3	TT	CT	AG	CC	2	1	0	1	1	0	0	1								0	0			0	0	0	1
GTS	M	20	7	TT	TT	AG	CT	2	1	0	1	0	0	0	0								1	0			1	0	0	1
GTS	M	12	11	AT	TT	AG	CT	3	1	1	1	1	0	0	0								0	0			0	0	0	1
GTS	M	31	8	TT	CT	AG	CC	3	1	1	0	0	1	0	0								0	0			0	0	0	0
GTS	M	3	2	AT	TT	AG	CC	1	0	0	0	0	0	0	0								0	0			0	0	0	1
GTS	M	10	6	TT	CT	AA	CT	2	1	0	0	1	0	1	0								0	1			0	0	0	1
GTS	M	8	4	TT	CT	AA	CC	2	1	1	0	0	0	0	0								0				1	0	0	0
GTS	M	8	4	TT	TT	AA	CC	1	1	1	0	0	0	0	0								0	0			0	0	0	0
GTS	M	15	7	AA	TT	AA	CT	2	1	0	1	0	0	0	0								1	0			1	0	0	0
GTS	M	16	9	TT	CT	AG	CC	2	1	0	1	0	0	0	0								0	0			0	0	0	0
GTS	M	15	7	TT	TT	AG	CC	1	1	0	0	0	0	0	0								0	0			0	0	0	1
GTS	M	14	5	AA	TT	AA	CC	1	1	1	1	1	0	0	0	0	1	26	46	0	1	1	0	1	1	1	0	0	0	1
GTS	M	8	6	AT	CT	AA	TT	2	1	1	0	0	0	1	0	0	0	7	27	0	0	0	0	0	0	0	0	0	0	1
GTS	M	6	4	AT	TT	AG	CC	1	0	0	0	0	0	0	0								0	0			0	0	0	0
GTS	M	17	11	AA	TT	AG	CT	3	1	0	1	1	1	0	0	0	1	36	76	0	0	1	0	0	0	0	0	0	0	0
GTS	M	36	5	TT	CT	AA	CC	1	1	1	0	0	0	0	0								0	0			1	0	0	0
GTS	M	31		TT	CT	AG	CT	3	1	1	1	0	1	1	0								1	0			1	1	0	0
GTS	M	11	5	AA	TT	AG	CT	2	0	0	0	0	0	0	0								0	0			0	0	0	0
GTS	M	30	7	AA	TT	GG	CT	2	1	0	1	1	0	0	0	0	0	23	33	0	0	1	0	0	1	0	0	0	0	1
GTS	M	13	12	AT	TT	AG	CC	2	1	1	1	1	0	1	0	1	0	35	65	0	1	1	1	0	1	0	1	0	0	1
GTS	M	8	4	TT	CT	AA	CC	2	0	0	0	0	0	0	0								0	0			0	0	0	0
GTS	M	7	6	TT	CT	AG	CC	3	1	0	0	0	0	0	0	0	0	33	53	0	0	0	1	1	0	1	0	0	0	1
GTS	F	28	6	TT	CT	AA	CC	2	1	0	1	0	0	0	0	0	0	17	27	1	1	0	0	1	1	1	0	0	0	0
GTS	M	20	2	AT	CT	AA	CC	3	1	0	1	1	1	1	0	0	1	33	73	0	0	1	1	1	1	1	0	0	0	1
GTS	F	9	5	AA	TT	AA	CT	3	1	1	1	0	0	0	0								1	1			0	0	0	1
GTS	M	17	6	AT	CT	AA	CT	3	1	1	1	1	0	0	0								1	0			1	1	1	0
GTS	F	19	6	AT	TT	AG	CT	2	1	0	0	0	0	1	0								0	0			0	0	0	1
GTS	F	11	6	AT	TT	AG	CC	2	0	0	0	0	0	0	0								0				0	0	0	0
GTS	F	8	5	AA	TT	AG	CT	2	1	1	0	0	0	0	0	0	0	13	13	0	0	1	1	0	0	0	1	0	0	0
GTS	M	24	6	AT	CT	AA	CT	3	1	1	0	1	1	1	0								1	1			1	0	1	1
GTS	F	25	6	AT	TT	AA	CC	2	1	0	1	0	0	0	0								0	0			0	0	0	0
GTS	F	8	7	TT	CT	AG	CT	3	1	1	1	0	0	0	0								0	0			0	0	0	1
GTS	F	18		AA	TT	AA	CT	1	0	0	0	0	0	0	0								0	0			0	0	0	0
GTS	F	22	15	AA	TT	AA	CT	2	1	0	0	0	1	0	0								0	0			0	1	0	0
GTS	M	11	7	AA	TT	AG	CT	2	1	1	1	1	0	0	0								0	0			1	1	0	0
GTS	M	12	7	AT	CT	GG	CC	2	1	1	0	1	0	0	0	0	0	35	65	0	1	1	0	0	1	0	0	1	0	0
GTS	M	25	6	TT	CC	AG	CT	2	1	0	1	1	0	1	0	0	0	21	21	0	1	1	0	0	1	0	0	0	0	0
GTS	F	16	4	AT	TT	AG	CT	2	1	0	0	0	1	0	0								0	0			0	1	0	1
GTS	F	10	10	AT	TT	GG	CC	2	1	0	0	1	0	0	0	0	1	15	15	0	0	1	0	0	1	1	0	0	0	0
GTS	M	38		AA	TT	AG	CC	2	0	0	0	0	0	0	0	0	1	25	35	0	0	1	0	0	1	0	0	0	0	1
GTS	M	21	12	AA	TT	GG	CT	3	1	1	1	1	0	0	0	0	0	23	43	0	0	0	0	1	1	0	0	0	0	0
GTS	F	38	7	AT	TT	AA	CC	3	1	1	1	0	1	1	1	0	1	36	76	1	1	1	0	0	1	0	0	1	0	1
GTS	M	10	7	AA	TT	AG	CC	1	0	0	0	0	0	0	0	0	0	6	6				0	0			0	0	0	1
GTS	M	12	6	TT	CT	AA	CC	2	1	0	0	0	0	1	0	0	0	21	41				0	1			1	1	0	1
GTS	M	18	14	AA	TT	GG	CC	2	1	0	0	1	0	0	0	0	0	28	38				1	1			0	0	0	0
GTS	F	25		AT	TT	AG	CC	1	0	0	0	0	0	0	0	0	0	13	13				0	0			0	0	0	0
GTS	F	32		AA	TT	AG	CC	2	0	0	0	0	0	0	0	0	0	16	26	0	0	0	0	0	1	0	0	0	0	1
GTS	F	18	12	AT	TT	AG	CC	2	0	0	0	0	0	0	0	0	0	19	39	0	0	0	0	0	0	0	0	0	0	0
GTS	F	22	10	TT	CT	AG	CC	1	0	0	0	0	0	0	0	0	0	12	32	0		1	0	0	1		0	0	0	1
GTS	F	8	4	AT	TT	AG	CC	2	1	0	1	0	0	1	0	0	0	24	24	0	0	0	0	0	0		0	0	0	1
GTS	M	17	5	AA	TT	AA	CC	2	1	0	1	0	0	1	0	0	0	23	43	0	0	0	0	0	1	1	0	0	0	0
GTS	M	23	4	AT	CT	GG	CC	2	1	0	1	1	1	1	0	0	0	33	63	0	1	1	0	1	1	1	0	0	1	0
GTS	F	31		AT	TT	AA	CC	3	1	1	0	0	1	1	0	0	0	31	71	1	0	1	0	1	0	0	1	1	1	1
GTS	M	10	9	TT	CT	AA	CC	2	1	0	0	0	0	1	0	0	0	22	42	0	0	0	0	0	0	1	0	0	0	1
GTS	F	21	7	AT	CT	AG	CC	3	1	0	1	0	1	0	0	0	0	38	78	1	1	1	1	1	1	0	0	0	1	1
GTS	F	7	4	AA	TT	AG	CC	2	1	1	1	0	0	1	0	0	1	27	37	0	0	1	0	0	0	1	1	0	0	1
GTS	M	8	7	TT	CT	AG	CC	1	1	1	1	0	0	1	0	0	0	24	24	0	0	1	0	0	0	1	1	0	0	1
GTS	M	25	13	AT	CT	AA	CC	3	1	0	1	0	0	1	0	0	0	30	60	1	0	0	0	1	0	0	0	0	0	1
GTS	M	5	3	TT	CT	AA	CC	1	1	0	0	0	0	1	0	0	1	19	19	0	0	0	0	1	0	1	0	0	0	1
GTS	M	12	4	TT	CT	AG	CC	2	1	1	1	1	0	1	0	0	1	27	7	0	1	1	0	1	1	0	1	1	1	1
GTS	M	22	10	AA	TT	AG	CC	3	0	0	0	0	0	0	0	0	0	28	8	0	0	1	0	0	1	0	0	0	0	0
GTS	F	17	8	AT	TT	AA	CC	2	1	0	1	0	1	0	0	0	0	18	18	0	0	0	0	0	1	0	0	1	0	0
GTS	M	9	5	TT	TT	AA	CC	1	1	0	1	0	0	1	0	0	1	31	31	0	0	0	0	1	0	1	0	0	0	1
GTS	M	22		AA	TT	AA	CC	2	1	1	1	0	0	1	0	0	0	22	42	0	0	1	0	1	0	0	1	0	0	0
GTS	M	21	8	AT	TT	AG	CC	2	1	0	1	0	0	0	0	0	0	32	62	1	1	1	1	0	1	0	1	0	0	1
GTS	M	18	6	AA	TT	AG	CC	3	1	0	1	1	0	0	0	0	1	40	60	1	0	1	0	0	1	0	1	0	0	1
GTS	M	23	5	AA	TT	GG	CT	3	1	0	1	0	1	1	0	0	0	26	6	0	1	1	0	0	1	1	0	0	1	1
GTS	M	21	8	AA	TT	GG	CC	2	0	0	0	0	0	0	0	0	1	30	60	1	0	1	0	1	1	0	0	0	0	1
GTS	M	32	6	AA	TT	AG	CT	3	1	0	1	0	1	0	0	0	0	32	62	1	0	1	0	1	1	0	1	0	0	1
GTS	F	35	10	TT	TT	AA	CC	2	0	0	0	0	0	0	0	0	0	20	40	0	0	1	0	0	1	1	0	0	0	1
GTS	M	18	10	TT	CC	AA	CC	3	1	0	1	0	1	1	0	1	0	28	8	0	1	1	0	0	1	1	1	1	1	1
GTS	M	27	4	AT	TT	AA	TT	2	1	1	1	1	0	0	1	0	1	24	34	0	0	0	0	0	0	1	0	0	0	1
GTS	M	8	6	AT	TT	AA	CC	2	0	0	0	0	0	0	0	0	0	27	27	1	0	0	0	1	1	0	0	0	0	1
GTS	F	6	5	AT	TT	AG	CC	1	1	0	1	0	0	0	0	0	0	28	38	0	0	1	0	1	1	0	0	0	0	1
GTS	F	12	8	AT	TT	AG	CT	2	1	0	1	0	0	1	0	0	0	10	10	1	0	1	0	0	0	0	0	0	0	0
GTS	M	37	5	AA	TT	AG	CT	3	1	0	0	0	1	1	0	0	0	31	71	0	0	1	0	0	0	0	0	1	0	0
GTS	M	15	9	AT	CT	GG	CT	3	1	0	0	0	0	1	0	0	0	19	29	0	1	1	0	0	1	0	0	0	1	1
GTS	M	6	5	AA	TT	AA	CT	1	1	0	1	0	0	1	0	0	0	20	30	0	0	0	0	0	0	0	0	0	0	1
GTS	M	5	5	AT	TT	AG	CC	2	1	1	0	0	0	1	0	0	0	34	4	0	0	1	1	1	1	1	1	0	0	0
GTS	M	8	3	AA	TT	AG	CT	2	1	0	1	0	0	1	0	0	0	16	26	0	0	1	0	0	1	0	0	0	0	1
GTS	M	16	4	AA	TT	AA	CT	3	1	1	1	1	0	1	0	0		40	80	1	1	0	0	1	0	1	1	1	1
GTS	M	21	7	AT	TT	AG	CC	3	1	1	1	0	0	1	0	0	0	22	2	0	0	0	0	0	1	1	1	0	1	0
GTS	M	7	6	TT	CT	AG	CT	2	1	1	0	0	0	0	0	0	0	20	30	0	0	1	1	0	0	0	0	0	0	1
GTS	M	10	4	AT	TT	GG	CC	1	0	0	0	0	0	0	0	0	0	19	19	0	0	1	0	0	1	0	0	0	0	1
GTS	M	21	6	TT	CC	AG	CT	3	1	1	1	0	0	1	1	1	1	42	92	0	1	1	1	0	1	1	1	1	1	1
GTS	M	19	8	AT	TT	AG	CC	2	1	0	1	0	0	1	0	0	1	28	48	0	1	1	0	0	1	1	0	0	1	1
GTS	M	10	3	AT	CT	AA	CC	2	0	0	0	0	0	0	0	0	0	26	36	0	0	0	0	0	0	0	0	0	0	1
GTS	M	32	5	TT	CT	AG	CT	3	0	0	0	0	0	0	0	0	0	22	32	0	1	1	0	0	1	0	0	0	0	1
GTS	M	11	2	AT	CT	AA	CT	3	1	1	0	1	0	0	1	1	0	40	70	0	1	1	1	0	0	0	1	1	1	0
GTS	M	9	4	AT	CT	AA	CT	3	1	1	0	0	0	0	0	0	1	37	67	0	0	0	0	0	1	0	0	0	0	1
GTS	M	13	6	TT	TT	GG	CC	3	1	0	0	0	0	1	0	0	0	39	79	1	0	0	0	0	1	0	0	1	0	0
GTS	M	8	6	AT	TT	AG	CC	2	1	0	1	0	0	1	0	0	0	30	0	0	1	1	0	0	1	1	0	1	0	1
GTS	M	8	4	AA	TT	AA	CT	1	1	0	0	0	0	0	0	0	0	23	33	0	0	1	0	0	0	1	1	0	0	0
GTS	M	33	7	AT	CT	GG	CT	1	1	0	1	0	0	0	0	0	0	20	40	0	0	0	0	0	1	0	0	0	0	1
GTS	F	18	8	AT	TT	AA	CC	3	1	0	1	1	1	1	0	0	0	43	83	1	1	1	1	1	1	1	1	1	0	1
GTS	M	33	7	AT	TT	AA	CC	3	1	1	1	0	0	1	0	0	1	43	93	1	0	0	1	1	1	0	0	1	0	1
GTS	M	26	6	TT	TT	GG	CC	2	1	0	1	0	1	1	0	0	1	13	33	0	0	0	0	0	1	0	0	0	0	1
GTS	M	12	5	AA	TT	GG	TT	3	1	1	1	0	0	1	0	1	1	39	79	0	1	1	1	1	1	1	1	1	0	1
GTS	M	14	4	AT	TT	AA	CC	2	1	1	1	0	0	1	0	1	0	34	64	1	1	1	1	1	1	1	1	1	0	0
GTS	M	8	4	TT	CT	AA	CT	2	0	0	0	0	0	0	0	0	0	20	40	0	0	1	0	0	1	0	0	0	0	1
GTS	M	10	3	AA	TT	AA	CC	2	1	1	0	0	0	0	0	0	1	21	41	0	0	0	0	1	1	1	1	0	0	1
GTS	M	8	3	AT	TT	AA	CT	3	1	0	0	0	0	0	0	1	0	40	80	0	0	0	1	1	0	0	1	0	1	0
GTS	M	12	9	AT	CT	AG	CT	3	1	1	1	1	0	1	0	0	1	38	68	0	0	0	1	0	0	0	1	1	0	1
GTS	M	35	8	AT	CT	AA	CC	3	1	1	1	1	1	1	0	0	1	37	87	1	0	1	1	1	1	0	1	1	0	0
GTS	M	18	2	AT	TT	AG	CC	3	1	1	1	0	0	1	0	1	1	38	68	0	1	1	1	1	1	1	1	1	0	1
GTS	M	11	5	TT	TT	AG	CC	2	1	1	1	0	0	1	0	0	0	24	4	0	1	0	0	0	1	0	1	1	1	0
GTS	M	9	5	AT	TT	AG	CT	2	1	1	1	0	0	1	0	0	0	30	60	0	1	1	0	0	1	1	0	1	0	0
GTS	M	9	7	AA	TT	AG	CT	2	1	0	0	0	0	1	0	0	0	28	8	0	0	1	0	1	0	0	1	1	0	1
GTS	M	14	10	AT	CT	AG	CC	2	1	0	0	1	0	0	0	0	0	24	44	0	0	0	0	0	1	0	0	0	0	1
GTS	F	6	4	AT	CT	GG	TT	2	0	0	0	0	0	0	0	0	0	33	66	1	0	1	1	1	0	0	0	1	0	1
GTS	F	22	5	AA	TT	AG	CC	2	1	0	1	0	0	0	0	0	1	31	61	0	0	1	0	0	0	0	0	0	0	0
GTS	F	19	7	AA	TT	AG	CC	3	1	0	1	0	0	0	0	0	0	23	43	0	0	1	0	0	0	1	0	0	0	0
GTS	M	11	5	AT	CT	AG	CT	1	0	0	0	0	0	0	0	0	0	23	33	0	0	0	0	0	0	0	0	0	0	0
GTS	F	9	5	AT	CT	AA	CC	1	1	0	1	0	0	1	0	0	1	10	10	0	1	0	0	0	1	0	0	1	0	0
GTS	M	7	6	AA	TT	AA	CC	1	1	0	1	0	0	0	0	0	0	19	19	0	0	1	0	0	0	1	0	0	0	1
GTS	F	22	12	AT	CT	AA	CT	2	1	0	1	0	0	1	0	0	0	21	61	1	0	0	1	0	1	0	1	0	0	0
GTS	M	6	5	AA	TT	AG	CC	1	0	0	0	0	0	0	0	0	0	17	17	0	0	0	0	0	0	0	0	0	0	1
GTS	M	10	7	AA	TT	AG	CC	2	1	0	1	0	0	0	0	0	1	18	38	0	1	1	0	1	0	0	0	0	0	1
GTS	M	9	4	AA	TT	GG	CT	2	1	1	0	0	0	1	0	0	0	8	8	0	0	1	0	0	0	1	0	0	1	1
GTS	M	30	6	AT	TT	GG	CC	2	1	0	1	0	0	0	0	0	0	31	1	1	0	0	0	1	0	0	0	0	0	0
GTS	M	14	8	AT	CT	AA	CC	3	1	0	1	0	0	0	0	0	1	42	62	0	0	1	1	0	0	0	0	0	0	0
GTS	F	19		AT	TT	GG	CC	3	1	0	1	1	0	1	0	0	0	21	21	0	1	0	1	1	1	1	1	1	1	0
GTS	M	15	3	AA	TT	AG	CC	2	0	0	0	0	0	0	0	0	1	18	18	0	0	1	0	0	1	0	0	0	0	1
GTS	M	9	4	AT	TT	AG	CC	1	1	0	1	1	0	0	0	0	0	20	30	0	0	1	1	0	0	1	0	0	0	0
GTS	F	9	3	AA	TT	AA	CC	3	1	0	1	0	0	1	0	1	1	46	86	1	0	0	1	1	0	1	1	1	0	1
GTS	M	25	3	AA	TT	AG	CT	2	1	0	1	0	0	1	0	0	0	10	20	0	0	1	0	0	1	0	1	0	0	0
GTS	F	6	6	AT	TT	AA	CC	1	1	0	1	0	0	0	0	1	0	31	31			0	0	1		1	1	1	0	1
GTS	M	6	4	AA	TT	GG	CT	2	0	0	0	0	0	0	0	0	1	29	29	0	0	1	1	1	0	1	1	0	0	1
GTS	M	10	4	TT	TT	AG	CT	2	1	0	1	0	0	1	0	1	1	33	3	0	0	1	0	0	0	0	1	0	1	0
GTS	M	8	7	TT	CT	AG	CC	2	1	1	1	1	0	0	0	1	0	20	0			0	1	0		1	1	1	1	1
GTS	M	14	5	AA	TT	AG	CT	2	0	0	0	0	0	0	0	0	0	31	1	0	0	1	0	0	1	0	0	0	0	1
GTS	F	11	5	AA	TT	AA	CC	2	1	0	1	0	0	0	0	0	0	41	71	0	0	1	1	1		1	0	1	1	0
GTS	F	8	5	AT	CT	AG	CC	2	1	0	1	0	0	1	0	0	0	26	46	0	0	1	0	1	0	1	1	1	1	0
GTS	M	7	5	AT	CT	AA	CT	1	0	0	0	0	0	0	0	0	0	11	11	0	0	0	0	0	0	0	0	0	0	1
GTS	M	18	8	AA	TT	AA	CT	2	1	0	0	0	0	1	0	0	0	32	52	0	1	0	1	0	1	0	0	1	0	0
GTS	M	7	3	AA	TT	GG	CC	2	1	0	1	0	0	0	0	0	1	34	74	0	0	1	0	1	1	1	0	1	1	0
GTS	M	15	3	AT	TT	AG	CC	3	1	1	1	0	0	0	0	0		43	83	0	1	1	1	1		1	0	1	1
GTS	M	10	8	TT	TT	AA	CC	3	1	1	0	0	0	0	0	0	0	36	66	0	0	0	1	0	0	0	1	0	0	0
GTS	M	13	6	AA	TT	AG	CT	3	1	0	0	0	0	1	0	1	0	29	69	0	0	0	0	0	1	1	1	1	0	1
GTS	F	16	7	AA	TT	AG	CC	2	1	0	1	0	0	1	0	0	0	27	57	1	0	1	0	1	1	0	0	1	0	1
GTS	M	8	4	AT	CT	AG	CT	3	1	0	1	0	0	1	0	1	0	38	78	0	0	1	1	0	1	1	1	0	0	1
GTS	M	11	7	AT	CT	GG	CC	2	0	0	0	0	0	0	0	0	1	31	61	0	0	1	0	0	0	1	0	1	0	1
GTS	F	40		AT	TT	AA	CC	2	1	0	0	0	1	1	0	0	0	21	51	0	0	0	0	0	0	0	1	1	0	0
GTS	M	15		AA	TT	AG	CC	3	1	0	1	0	0	0	0	0							1	0			0	0	0	1
GTS	M	19	3	AA	TT	AG	CT	3	1	1	1	1	0	0	0	0							1	1			0	1	0	1
GTS	M	50		AA	TT	AG	TT	3
GTS	M	9	4	TT	TT	AA	CC	3	1	0	1	0	0	0	0	0							0	1			0	0	0	1
GTS	M	17	11	TT	CC	GG	CT	2	0	0	0	0	0	0	0	0							0	0			0	0	0	1
Control	F	27		TT	TT	AA	CC
Control	F	28		AA	TT	AA	CT
Control	M	24		AA	TT	AA	CC
Control	F	25		TT	TT	AA	CC
Control	M	24		AT	TT	AG	CT
Control	F	24		AA	TT	AG	CT
Control	F	19		AT	TT	AG	CT
Control	F	25		AT	CT	AG	CT
Control	F	25		AT	CT	GG	CT
Control	M	35		AT	TT	AA	CC
Control	F	26		TT	TT	AA	CC
Control	M	19		AT	TT	AA	CC
Control	M	22		TT	CT	GG	CT
Control	M	21		AA	TT	AA	CT
Control	M	21		AT	TT	AA	CT
Control	M	21		AT	TT	AA	CC
Control	M	21		AA	TT	AA	CT
Control	M	21		AT	CT	AG	TT
Control	M	21		AA	TT	AA	CC
Control	M	21		AA	TT	AG	CC
Control	M	21		TT	TT	AG	CC
Control	M	21		AA	TT	AG	CC
Control	M	21		AT	CT	GG	TT
Control	M	21		AT	CT	GG	CT
Control	M	21		AA	TT	AG	CT
Control	M	21		AA	TT	GG	CC
Control	M	20		AT	TT	AA	CC
Control	M	21		AT	TT	AG	CC
Control	M	21		TT	TT	AA	CC
Control	M	21		AA	TT	AA	CC
Control	M	21		AT	TT	GG	CC
Control	M	21		AT	TT	AG	CC
Control	M	21		AT	TT	AA	CC
Control	M	21		TT	CT	AG	TT
Control	M	21		AA	TT	AG	CT
Control	M	21		AT	TT	AA	CC
Control	M	22		AA	TT	AG	CC
Control	M	20		TT	CT	AG	CT
Control	M	21		AT	TT	AA	CC
Control	M	20		AT	TT	AA	CT
Control	M	21		AT	TT	AA	CT
Control	M	20		AA	TT	GG	CC
Control	F	25		AT	TT	AG	TT
Control	F	27		AT	TT	AG	CT
Control	M	20		TT	CT	AA	CC
Control	M	22		AA	TT	AG	CT
Control	M	21		AA	TT	AA	CC
Control	M	21		AT	CT	AG	CT
Control	M	21		TT	CC	AA	CT
Control	M	21		AT	CT	AG	CT
Control	M	21		AT	TT	AA	CT
Control	M	21		TT	TT	GG	CC
Control	M	21		AA	TT	AG	CC
Control	M	21		AT	TT	AG	CT
Control	M	22		AA	TT	GG	CT
Control	M	21		TT	TT	AA	CC
Control	M	20		AT	TT	AA	CC
Control	M	20		AT	TT	AA	CT
Control	M	20		AT	TT	AA	CT
Control	M	21		AA	TT	AG	CC
Control	M	22		AT	TT	AA	CC
Control	M	21		AT	TT	AA	CT
Control	M	21		AT	TT	AA	CT
Control	M	21		AA	TT	AG	CC
Control	M	25		AT	TT	AA	CC
Control	M	22		AT	TT	AG	CC
Control	F	24		AA	TT	AA	CT
Control	F	27		AT	TT	AG	CC
Control	F	23		AA	TT	AG	CC
Control	F	27		AA	TT	AA	CC
Control	M	24		AT	TT	AG	CT
Control	M	23		AA	TT	AG	CC
Control	F	26		AT	TT	AA	CT
Control	F	23		AT	TT	AG	CC
Control	M	25		AT	TT	AG	CC
Control	F	23		AA	TT	AG	CC
Control	F	23		TT	TT	AA	CC
Control	F	23		AT	TT	AG	CC
Control	F	23		AT	CT	AG	CT
Control	F	24		AA	TT	AG	CC
Control	F	23		AT	CT	AG	CT
Control	M	23		AA	TT	AA	CT
Control	F	23		AT	CT	AG	CC
Control	F	26		TT	TT	AA	CC
Control	M	23		AT	TT	AG	CC
Control	F	24		AT	TT	AA	CC
Control	F	23		AA	TT	AG	CT
Control	F	23		AT	TT	AG	CC
Control	M	23		AT	TT	AG	CT
Control	M	23		AA	TT	AG	TT
Control	M	23		TT	CT	AG	CT
Control	M	22		AT	TT	GG	CT
Control	M	25		AT	TT	AG	CC
Control	M	23		AA	TT	GG	CT
Control	F	23		AT	TT	GG	CT
Control	M	24		AT	TT	AG	CT
Control	M	24		AA	TT	AA	CC
Control	M	25		AT	TT	AG	CT
Control	M	23		AT	TT	GG	CC
Control	F	23		AT	TT	AG	CC
Control	F	23		TT	TT	AG	CT
Control	M	22		AA	TT	AG	CT
Control	F	22		TT	CT	AG	CT
Control	F	22		AA	TT	AG	CC
Control	M	25		TT	CT	AA	CC
Control	M	25		TT	TT	AA	CC
Control	F	25		AT	TT	AA	CC
Control	M	25		AT	TT	AG	TT
Control	M	25		AA	TT	AG	CC
Control	F	26		AA	TT	GG	TT
Control	M	25		AT	CT	AA	CT
Control	M	25		AT	TT	AG	CC
Control	M	25		TT	TT	AA	CC
Control	M	24		TT	TT	AA	CC
Control	M	24		TT	TT	AG	CC
Control	M	26		TT	CC	AG	CC
Control	M	25		AT	TT	AA	CC
Control	M	22		AT	TT	AA	CT
Control	F	22		AA	TT	AG	CT
Control	F	22		AA	TT	GG	CC
Control	F	22		TT	CC	GG	CC
Control	F	22		AT	TT	AG	CC
Control	F	25		AT	TT	AA	CT
Control	M	23		AT	TT	AA	CT
Control	M	24		AA	TT	AA	CT
Control	M	24		AA	TT	AG	CC
Control	M	24		TT	TT	AA	CT
Control	M	25		AT	CT	AG	TT
Control	M	24		AA	TT	GG	CC
Control	M	27		AT	TT	AG	CC
Control	M	24		AT	TT	AA	CC
Control	M	24		AA	TT	AG	CC
Control	M	22		TT	CT	AA	TT
Control	F	22		AA	TT	AA	CT
Control	F	22		AT	TT	AA	CT
Control	F	22		AT	TT	AA	CC
Control	M	24		AT	CT	AA	CC
Control	M	23		AT	TT	AA	CC
Control	M	22		TT	CT	AG	CC
Control	M	23		AT	TT	AG	CC
Control	F	22		AT	CT	AG	CC
Control	F	22		TT	TT	AG	CC
Control	F	24		AT	TT	AA	CC
Control	F	22		AT	TT	AA	TT
Control	M	22		TT	TT	AA	CT
Control	M	23		AT	CT	AG	CC
Control	M	22		AT	CT	AG	CT
Control	M	22		AA	TT	AG	CC
Control	M	22		TT	TT	AA	CT
Control	M	22		TT	TT	AA	CT
Control	M	27		TT	TT	AA	CT
Control	F	22		TT	TT	AA	CT
Control	M	25		TT	CT	AG	CC
Control	M	23		AT	TT	GG	CC
Control	M	23		AT	TT	AG	CT
Control	M	23		AA	TT	GG	CT
Control	M	23		AA	TT	GG	CC
Control	M	23		AA	TT	GG	CC
Control	M	23		AT	CT	GG	CC
Control	M	24		AT	TT	AG	CC
Control	F	24		TT	TT	AA	CC
Control	M	22		AT	CT	AG	CT
Control	M	22		AA	TT	AA	CC
Control	M	25		AA	TT	AG	CT
Control	F	23		TT	CT	AG	CT
Control	M	24		AT	TT	AG	CT
Control	M	23		AT	TT	AG	CT
Control	M	23		AT	CT	AG	CC
Control	F	24		AT	TT	AA	CC
Control	M	23		AT	TT	AA	CC
Control	M	23		AT	TT	AA	CT
Control	F	23		TT	TT	AA	CC
Control	F	24		AT	TT	AA	CT
Control	F	20		AA	TT	AA	CC
Control	F	20		AT	TT	AG	CT
Control	F	23		TT	CC	AG	CC
Control	F	23		AA	TT	AA	CC
Control	M	24		TT	TT	AA	CC
Control	M	23		AT	TT	AG	CC
Control	M	24		AT	TT	AA	CT
Control	M	20		AT	TT	AG	CT
Control	M	23		AT	TT	AG	CC
Control	M	23		AT	TT	AG	CT
Control	M	24		AT	TT	AA	CC
Control	M	21		AA	TT	AG	CC
Control	M	21		AT	TT	AG	CC
Control	M	21		AA	TT	GG	CC
Control	M	20		AT	TT	AA	CT
Control	M	20		TT	TT	AG	CC
Control	M	21		AT	TT	AA	CT
Control	M	20		AT	TT	AA	CT
Control	M	22		AA	TT	AG	CC
Control	M	23		AT	TT	AA	CC
Control	M	20		AT	TT	AG	CC
Control	M	21		AA	TT	AA	CC
Control	M	20		AA	TT	AG	CT
Control	M	20		AA	TT	AG	CC
Control	M	22		AT	CT	AG	CT
Control	M	22		AT	TT	AG	TT
Control	M	22		AT	TT	AA	CC
Control	M	21		AT	TT	AG	CC
Control	M	23		AA	TT	AG	CC
Control	M	20		AA	TT	AG	CC
Control	M	20		AA	TT	AG	CT
Control	M	22		AA	TT	AA	CC
Control	M	20		TT	TT	AG	CC
Control	M	20		AT	TT	AG	CC
Control	M	20		AT	CT	GG	CT
Control	F	21		TT	TT	AA	CT
Control	F	20		AT	TT	AG	CT
Control	F	20		AT	TT	GG	CC
Control	F	20		TT	CT	AG	CT
Control	M	20		AT	TT	GG	CC
Control	M	22		TT	TT	AA	CC
Control	M	20		TT	CT	AG	CT
Control	M	20		AT	TT	AG	CT
Control	M	13		AT	TT	AG	CT
Control	M	21		AT	TT	AG	CC
Control	M	21		AT	CT	AG	CC
Control	M	20		AT	TT	AG	CC
Control	M	21		AA	TT	GG	CC
Control	M	20		TT	CC	AG	CT
Control	F	20		AT	TT	AG	CT
Control	M	21		AT	CT	AG	TT
Control	M	21		AA	TT	AA	CC
Control	M	21		AA	TT	AA	TT
Control	M	27		AT	CT	AG	CT
Control	M	23		AA	TT	GG	CT
Control	M	23		AT	TT	GG	CC
Control	F	22		TT	TT	AG	CC
Control	F	22		TT	CT	AG	CC
Control	M	21		AT	TT	AA	CT
Control	M	21		AA	TT	AG	CT
Control	M	20		TT	CT	AA	CC
Control	F	21		AT	CT	GG	CT
Control	M	21		TT	CT	AG	CT
Control	M	21		TT	CT	AA	CC
Control	M	21		TT	TT	AA	CC
Control	M	21		AT	TT	AA	CC
Control	M	21		AT	TT	AA	CT
Control	M	25		AT	TT	AG	CC
Control	M	21		AT	TT	AG	CT
Control	M	21		AA	TT	GG	CC
Control	F	21		TT	CT	AA	CC
Control	F	21		AA	TT	GG	CT
Control	M	23		TT	TT	AA	CC
Control	M	24		AA	TT	GG	CT
Control	M	23		TT	TT	AA	CC
Control	M	24		AT	CT	GG	CC
Control	M	24		AA	TT	GG	CT
Control	M	28		AT	TT	AA	CC
Control	M	22		AT	CT	GG	CT
Control	M	21		AA	TT	AA	CT
Control	M	21		AT	CT	AA	CC
Control	M	18		AT	TT	AG	CT
Control	M	21		AT	TT	AA	CC
Control	M	19		AA	TT	AA	CC
Control	M	19		AT	TT	AA	CC
Control	M	18		AA	TT	AG	TT
Control	M	22		AA	TT	AG	CC
Control	M	18		AT	TT	AA	CC
Control	M	18		TT	CT	AA	CC
Control	M	18		TT	CT	GG	TT
Control	M	22		AT	CT	GG	CC
Control	M	18		AT	TT	AA	CT
Control	M	18		TT	CT	AA	CC
Control	M	22		AA	TT	AG	CT
Control	M	19		AT	TT	GG	CT
Control	M	21		AT	TT	AA	CC
Control	M	21		TT	TT	AA	CC
Control	M	26		AA	TT	GG	CT
Control	M	26		AA	TT	AG	CC
Control	M	23		AA	TT	GG	CC
Control	M	23		AT	CT	AA	CT
Control	M	31		TT	TT	AA	CC
Control	M	22		AT	CT	AG	CC
Control	M	26		AA	TT	AG	CT
Control	M	54		AT	TT	AG	CC
Control	M	31		AT	TT	AG	CC

## Sheet: Abrevations
GTS	Gilles de la Tourette syndrome
M	male
F	female
ADHD	attention deficit hyperactivity disorder
OCD	obsessive compulsive disorder
OCS	obsessive compulsive symtoms
ODD	oppositional defiant disorder
FH	family history
YGTSS	the Yale Global Tic Severity Score
YGTSS TTS	the Total Tic Score of the Yale Global Tic Severity Score
SBTs	stimulus bound tics
